# Supplementary material
Source: PubMed Central journal article supplement (PMC4242446)
Supplement: supp_M051938_jlr.M051938-1.pdf [file supp_M051938_jlr.M051938-1.pdf]

## Supplementary figures and tables, belonging to

*“Prolonged niacin treatment leads to increased adipose tissue poly-unsaturated fatty acid synthesis and an anti-inflammatory lipid and oxylipin plasma profile”*

Mattijs M. Heemskerk<sup>1,2\*</sup>, Harish K. Dharuri<sup>1,2,a\*</sup>, Sjoerd A.A. van den Berg<sup>1,2,b</sup>, Hulda S. Jónasdóttir<sup>3</sup>, Dick-Paul Kloos<sup>3</sup>, Martin Giera<sup>3</sup>, Ko Willems van Dijk<sup>1,2,4</sup>, Vanessa van Harmelen<sup>1,2</sup>

<sup>1</sup> Department of Human Genetics, LUMC, Leiden, The Netherlands

<sup>2</sup> Einthoven laboratory for experimental vascular medicine, LUMC, Leiden, The Netherlands

<sup>3</sup> Center for Proteomics and Metabolomics, LUMC, Leiden, The Netherlands

<sup>4</sup> Department of Internal Medicine, LUMC, Leiden, The Netherlands

\* Both authors contributed equally

<sup>a</sup> Current address: Illumina, Inc., Hayward, CA, USA

<sup>b</sup> Current address: Department of Clinical Chemistry and Hematology, Amphia hospital, Breda, The Netherlands.

Table S I: qPCR primer sequences for the household genes *Prlp0* & *Cyclo* and for the target genes *Elovl5*, *Elovl6* & *Fads2*.

RNA was isolated from gWAT using the Nucleospin RNA/Protein kit (MACHEREY-NAGEL GmbH & Co. KG, Düren, Germany). Subsequently, 1µg of RNA was used for cDNA synthesis by iScript (BioRad, Hercules, CA, USA), which was purified by the Nucleospin Gel and PCR clean-up kit (Machery Nagel). Real-Time PCR was carried out on the IQ5 PCR machine (BioRad) using the Sensimix SYBR Green RT-PCR mix (Quantace, London, UK) and QuantiTect SYBR Green RT-PCR mix (Qiagen, Venlo, the Netherlands). Target mRNA levels were normalized to *Rplp0* & *Ppia* mRNA levels.

| Gen           | FW primer             | RV primer                | Temperature |
|---------------|-----------------------|--------------------------|-------------|
| <i>Rplp0</i>  | GGACCCGAGAAGACCTCCTT  | GCACATCACTCAGAATTTCAATGG | 60          |
| <i>Ppia</i>   | ACTGAATGGCTGGATGGCAA  | TGTCCACAGTCGGAAATGGT     | 61          |
| <i>Elovl5</i> | CAGCTTGCTTCTGTTCCCG   | TCCATTTTAAAACCTCTCTGCCT  | 61          |
| <i>Elovl6</i> | GCACTAAGACCGCAAGGCAT  | CTACGTGTTCTCTGCGCCTC     | 61          |
| <i>Fads2</i>  | CTGGTGGAACCAACCGACATT | TCTTGCCATACTCAAGGGGC     | 61          |

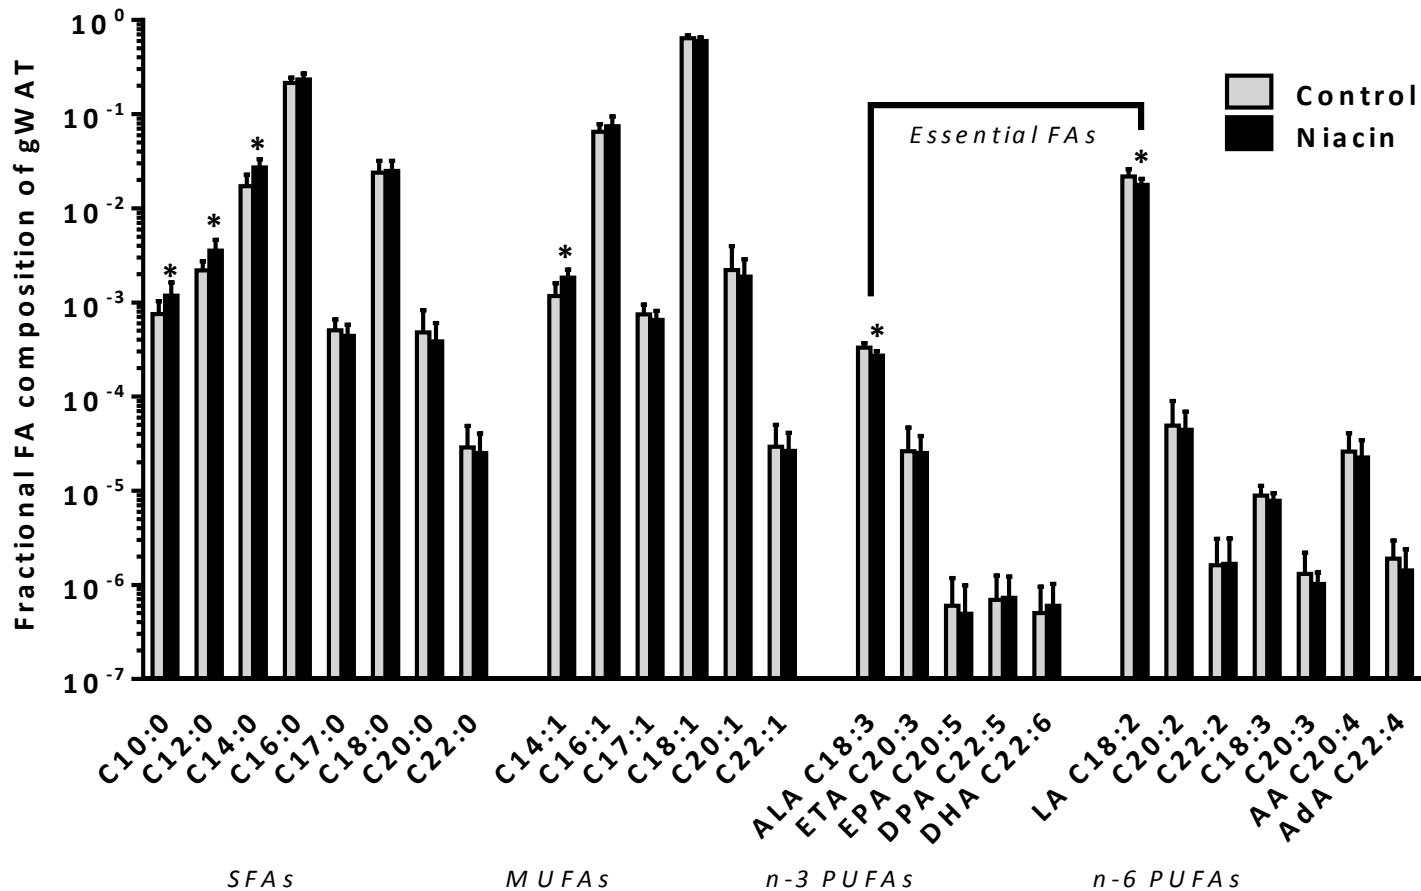

Figure S I: Adipose tissue fatty acid composition of gWAT from APOE\*3-Leiden.CETP mice fed a western type diet with 0.1% cholesterol with and without niacin. Mean $\pm$ SD, N=14 for Control/N=13 for Niacin, \* $p < 0.05$  compared to control gWAT after false discovery rate correction.

|                 | Control gWAT |          | Niacin gWAT     |          | Diet     |          | Control vs Niacin |
|-----------------|--------------|----------|-----------------|----------|----------|----------|-------------------|
| SFA             | Average      | SD       | Average         | SD       | Average  | SD       | P-value           |
| C10:0           | 0,0008       | 0,0003   | <b>0,0012</b>   | 0,0004   | 0,0013   | 0,0009   | (*)0,0078         |
| C12:0           | 0,0022       | 0,0005   | <b>0,0036</b>   | 0,0011   | 0,0019   | 0,0013   | (*)0,0005         |
| C14:0           | 0,0173       | 0,0054   | <b>0,0271</b>   | 0,0061   | 0,0059   | 0,0038   | (*)0,0003         |
| C16:0           | 0,2153       | 0,0285   | 0,2339          | 0,0360   | 0,4351   | 0,0571   | 0,1679            |
| C17:0           | 0,0005       | 0,0002   | 0,0004          | 0,0001   | 0,0014   | 0,0006   | 0,2804            |
| C18:0           | 0,0239       | 0,0081   | 0,0250          | 0,0069   | 0,2162   | 0,0331   | 0,7049            |
| C20:0           | 0,0005       | 0,0003   | 0,0004          | 0,0002   | 0,0030   | 0,0009   | 0,4066            |
| C22:0           | 2,88E-05     | 1,99E-05 | 2,51E-05        | 1,55E-05 | 3,00E-04 | 7,01E-05 | 0,6070            |
| <b>MUFA</b>     |              |          |                 |          |          |          |                   |
| C14:1           | 0,0012       | 0,0004   | <b>0,0018</b>   | 0,0004   | 0,0003   | 0,0002   | (*)0,0006         |
| C16:1           | 0,0652       | 0,0131   | 0,0745          | 0,0202   | 0,0055   | 0,0035   | 0,1773            |
| C17:1           | 0,0007       | 0,0002   | 0,0007          | 0,0002   | 0,0002   | 0,0001   | 0,1951            |
| C18:1           | 0,6400       | 0,0459   | 0,6007          | 0,0532   | 0,3036   | 0,0445   | 0,0593            |
| C20:1           | 0,0022       | 0,0018   | 0,0019          | 0,0010   | 0,0004   | 0,0002   | 0,5577            |
| C22:1           | 2,94E-05     | 2,05E-05 | 2,65E-05        | 1,47E-05 | 1,62E-05 | 1,13E-05 | 0,6729            |
| <b>PUFA n-3</b> |              |          |                 |          |          |          |                   |
| ALA C18:3       | 3,32E-04     | 3,89E-05 | <b>2,72E-04</b> | 3,37E-05 | 4,58E-04 | 9,25E-05 | (*)0,0003         |
| ETA C20:3       | 2,63E-05     | 2,06E-05 | 2,51E-05        | 1,31E-05 | 2,82E-06 | 1,61E-06 | 0,8598            |
| EPA C20:5       | 6,01E-07     | 5,83E-07 | 4,93E-07        | 4,93E-07 | 9,89E-07 | 9,91E-07 | 0,7985            |
| DPA C22:5       | 6,95E-07     | 5,62E-07 | 7,28E-07        | 5,00E-07 | 4,11E-07 | 3,58E-07 | 0,8961            |
| DHA C22:6       | 5,02E-07     | 4,58E-07 | 6,00E-07        | 4,28E-07 | 2,06E-06 | 4,75E-07 | 0,5940            |
| <b>PUFA n-6</b> |              |          |                 |          |          |          |                   |
| LA C18:2        | 2,19E-02     | 4,13E-03 | <b>1,78E-02</b> | 2,82E-03 | 2,32E-02 | 9,00E-03 | (*)0,0080         |
| C20:2           | 4,91E-05     | 4,09E-05 | 4,43E-05        | 2,49E-05 | 1,15E-05 | 4,28E-06 | 0,7206            |
| C22:2           | 1,62E-06     | 1,47E-06 | 1,67E-06        | 1,45E-06 | 7,95E-06 | 1,70E-06 | 0,9370            |
| C18:3           | 8,86E-06     | 2,45E-06 | 7,84E-06        | 1,59E-06 | 7,16E-07 | 4,56E-07 | 0,2231            |
| C20:3           | 1,31E-06     | 8,78E-07 | 1,02E-06        | 3,31E-07 | 3,55E-07 | 1,66E-07 | 0,2789            |
| AA C20:4        | 2,60E-05     | 1,47E-05 | 2,25E-05        | 1,18E-05 | 1,47E-06 | 9,51E-07 | 0,5065            |
| AdA C22:4       | 1,90E-06     | 1,07E-06 | 1,42E-06        | 9,62E-07 | 2,86E-07 | -        | 0,2540            |

Table S II: Adipose tissue fatty acid composition of gWAT from APOE\*3-Leiden.CETP mice fed a western type diet with 0.1% cholesterol with and without niacin and fatty acid composition of the western type diet. Fraction of total area corrected sum. Mean±SD, N=14 for Control/N=13 for Niacin/N=3 for diet.

(\*)Significant finding after false discovery rate correction.

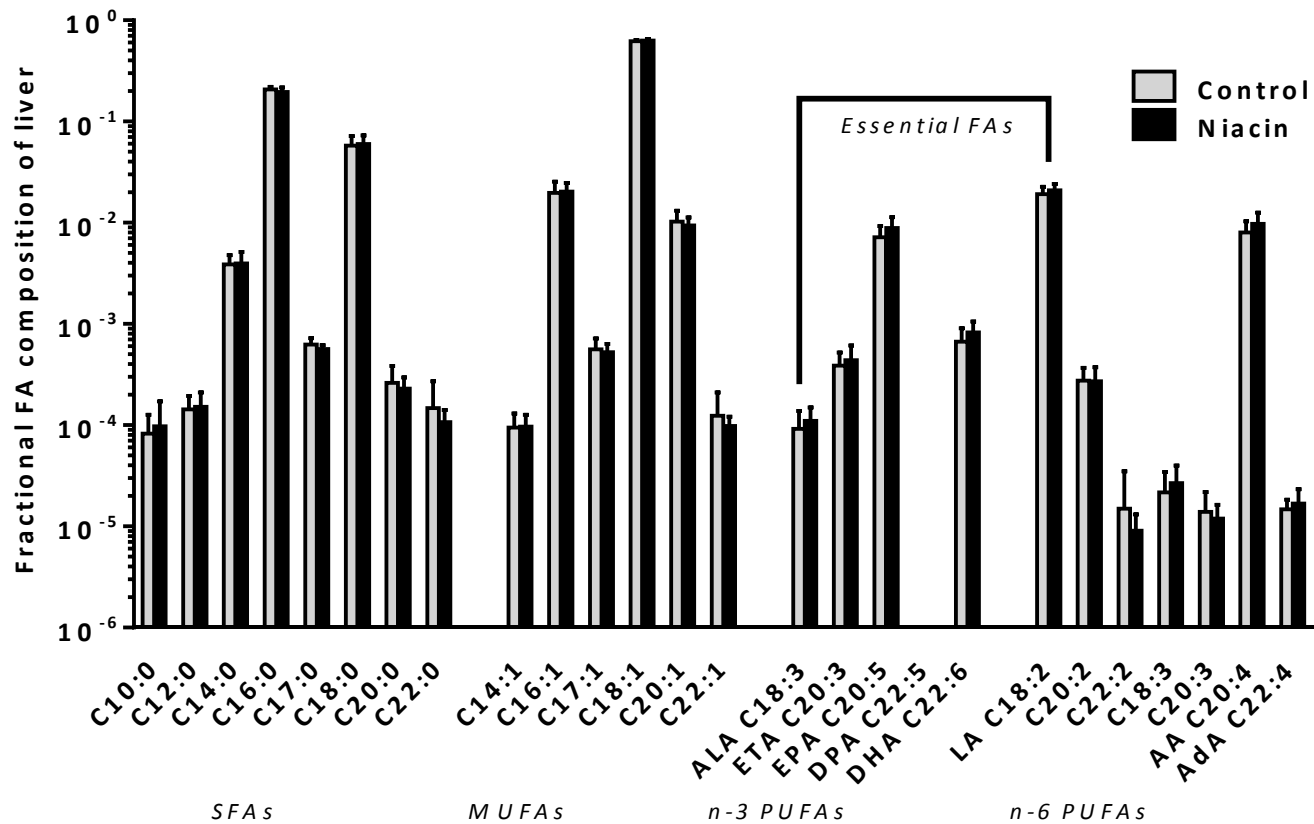

Figure S II: Liver fatty acid composition from APOE\*3-Leiden.CETP mice fed a western type diet with 0.1% cholesterol with and without niacin. Fraction of total area corrected sum. Mean±SD, N=14 for Control/N=13 for Niacin.

\*p<0.05 comparing control gWAT to niacin gWAT after false discovery rate correction.

|                 | Control Liver |          |  | Niacin Liver |          |  | Control vs Niacin |
|-----------------|---------------|----------|--|--------------|----------|--|-------------------|
| SFA             | Average       | SD       |  | Average      | SD       |  | P-value           |
| C10:0           | 8,23E-05      | 4,42E-05 |  | 9,74E-05     | 7,38E-05 |  | 0,5248            |
| C12:0           | 0,000143      | 5,17E-05 |  | 0,000152     | 5,92E-05 |  | 0,6948            |
| C14:0           | 0,003877      | 0,000907 |  | 0,003968     | 0,001167 |  | 0,8245            |
| C16:0           | 0,20753       | 0,013181 |  | 0,196168     | 0,020302 |  | 0,0989            |
| C17:0           | 0,000625      | 9,85E-05 |  | 0,000565     | 5,39E-05 |  | 0,0739            |
| C18:0           | 0,057714      | 0,014338 |  | 0,059939     | 0,013182 |  | 0,6860            |
| C20:0           | 0,000262      | 0,000122 |  | 0,000229     | 6,67E-05 |  | 0,4218            |
| C22:0           | 0,000147      | 0,000125 |  | 0,000107     | 3,45E-05 |  | 0,2909            |
| <b>MUFA</b>     |               |          |  |              |          |  |                   |
| C14:1           | 9,46E-05      | 3,57E-05 |  | 9,7E-05      | 2,96E-05 |  | 0,8528            |
| C16:1           | 0,019737      | 0,00563  |  | 0,020314     | 0,004366 |  | 0,7759            |
| C17:1           | 0,00056       | 0,000161 |  | 0,000524     | 0,000112 |  | 0,5268            |
| C18:1           | 0,621529      | 0,018559 |  | 0,628717     | 0,023243 |  | 0,3893            |
| C20:1           | 0,010283      | 0,002869 |  | 0,009425     | 0,001852 |  | 0,3834            |
| C22:1           | 0,000124      | 8,64E-05 |  | 9,79E-05     | 2,31E-05 |  | 0,3213            |
| <b>PUFA n-3</b> |               |          |  |              |          |  |                   |
| ALA C18:3       | 9,17E-05      | 4,6E-05  |  | 0,00011      | 3,92E-05 |  | 0,2796            |
| ETA C20:3       | 0,000388      | 0,000133 |  | 0,000438     | 0,000173 |  | 0,4111            |
| EPA C20:5       | 0,00721       | 0,00204  |  | 0,00886      | 0,002503 |  | 0,0763            |
| DPA C22:5       | -             | -        |  | -            | -        |  |                   |
| DHA C22:6       | 0,000669      | 0,000237 |  | 0,000828     | 0,000228 |  | 0,0945            |
| <b>PUFA n-6</b> |               |          |  |              |          |  |                   |
| LA C18:2        | 0,019119      | 0,003479 |  | 0,020887     | 0,003278 |  | 0,1973            |
| C20:2           | 0,000276      | 9,29E-05 |  | 0,000271     | 0,000102 |  | 0,9115            |
| C22:2           | 1,49E-05      | 2,02E-05 |  | 9,08E-06     | 4,02E-06 |  | 0,3334            |
| C18:3           | 2,17E-05      | 1,29E-05 |  | 2,69E-05     | 1,31E-05 |  | 0,3204            |
| C20:3           | 1,39E-05      | 7,87E-06 |  | 1,19E-05     | 4,41E-06 |  | 0,4437            |
| AA C20:4        | 0,008023      | 0,002318 |  | 0,009784     | 0,002791 |  | 0,0916            |
| AdA C22:4       | 1,47E-05      | 3,65E-06 |  | 1,69E-05     | 6,41E-06 |  | 0,3014            |

Table S III: Liver fatty acid composition from APOE\*3-Leiden.CETP mice fed a western type diet with 0.1% cholesterol with and without niacin. Fraction of total area corrected sum. Mean±SD, N=14 for Control/N=13 for Niacin.

(\*)Significant finding after false discovery rate correction.

| PUFA                         | Control         |        | Niacin          |        | Control vs Niacin |
|------------------------------|-----------------|--------|-----------------|--------|-------------------|
|                              | Average (ng/mL) | SD     | Average (ng/mL) | SD     | P-value           |
| ALA                          | 1139,98         | 69,76  | <b>784,61</b>   | 61,24  | (*)0,0007         |
| EPA                          | 91,51           | 7,10   | 82,03           | 6,51   | 0,3342            |
| DPA                          | 1373,47         | 118,48 | 1133,20         | 81,11  | 0,0996            |
| DHA                          | 1012,96         | 52,65  | 1194,23         | 52,00  | 0,0226            |
| LA                           | 9033,60         | 427,04 | 8875,20         | 273,66 | 0,7614            |
| AA                           | 5833,59         | 417,18 | 5342,29         | 192,80 | 0,2949            |
| AdA                          | 139,25          | 11,33  | 119,86          | 7,21   | 0,1608            |
| <b>Oxylipins</b>             |                 |        |                 |        |                   |
| 12-HETE                      | 140,60          | 100,95 | 138,77          | 121,74 | 0,9666            |
| Leukotriene E <sub>4</sub>   | 0,125           | 0,020  | 0,112           | 0,005  | 0,0324            |
| Prostaglandin D <sub>2</sub> | 0,545           | 0,073  | 0,528           | 0,097  | 0,6066            |
| Thromboxane B <sub>2</sub>   | 3,25            | 0,95   | 4,67            | 2,00   | 0,0252            |
| 14,15-diHETE                 | 0,247           | 0,075  | 0,291           | 0,127  | 0,2891            |
| 19,20-diHDPA                 | 0,696           | 0,131  | <b>1,011</b>    | 0,345  | (*)0,0065         |

Table S IV: Unfasted plasma PUFA and oxylipin concentrations of APOE\*3-Leiden.CETP mice fed a western type diet with 0.1% cholesterol with and without niacin. Mean±SD, N=14 for Control/N=13 for Niacin.

(\*)Significant finding after false discovery rate correction.

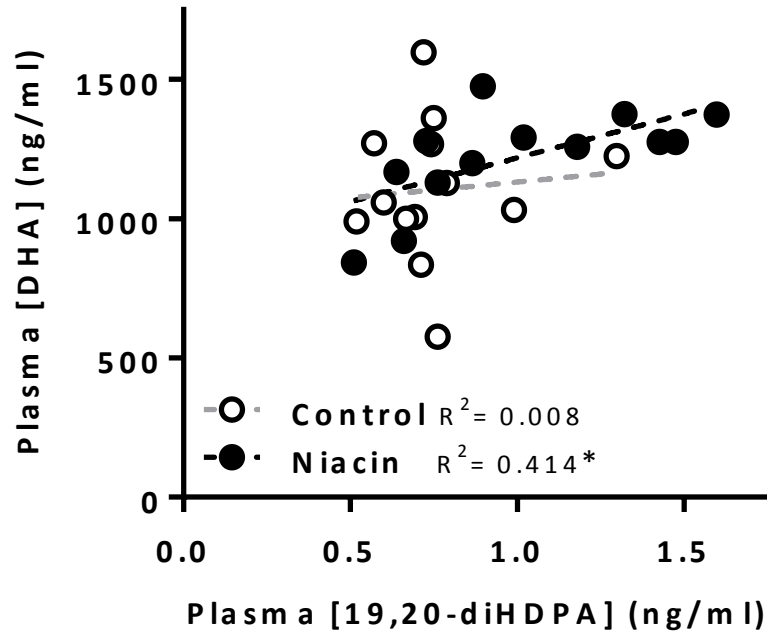

Figure S III: Correlation between the plasma concentrations of 19,20-dihydroxydocosapentaenoic acid and docosahexaenoic acid. N=14 mice per group, \* $p < 0.05$  compared to a slope of zero.



Table S V: Multiple Reaction Monitoring setup for ion transitions of the target compounds. Symbols in black refer to internal standards.

RT retention time,  
Q1 quadrupole 1 ion selection,  
Q3 quadrupole 3 ion selection,  
EP entrance potential,  
CE, collision energy,  
CCEP collision cell exit potential

HODEs, HOTrEs, HETEs, HEPEs, diHETEs and diHDPAs are given without chiral descriptors.

| Symbol                                   | Lipid Maps ID | RT (min) | Q1 (m/z) | Q3 (m/z) | DP (Volts) | EP (Volts) | CE (Volts) | CCEP (Volts) |
|------------------------------------------|---------------|----------|----------|----------|------------|------------|------------|--------------|
| RvE1                                     | LMFA03070019  | 4.0      | 349.1    | 195.0    | -95        | -10        | -22        | -13          |
| 20-hydroxy LTB <sub>4</sub>              | LMFA03020018  | 4.4      | 351.1    | 195.0    | -60        | -10        | -24        | -17          |
| 8-iso-PGF <sub>2</sub> α                 | LMFA03110001  | 5.1      | 353.1    | 193.0    | -135       | -10        | -34        | -11          |
| 15-keto-PGE <sub>2</sub>                 | LMFA03010030  | 5.1      | 349.0    | 234.9    | -65        | -10        | -20        | -13          |
| TxB <sub>2</sub>                         | LMFA03030002  | 5.2      | 369.1    | 169.0    | -55        | -10        | -24        | -15          |
| 8-iso-PGE <sub>2</sub>                   | LMFA03110003  | 5.3      | 351.1    | 271.0    | -5         | -10        | -24        | -19          |
| 13,14-dihydro-15-keto-PGE <sub>2</sub>   | LMFA03010031  | 5.6      | 351.1    | 235.0    | -45        | -10        | -30        | -13          |
| PGE <sub>2</sub> -d <sub>4</sub>         | LMFA03010008  | 5.6      | 355.1    | 193.0    | -50        | -10        | -26        | -17          |
| PGE <sub>2</sub>                         | LMFA03010003  | 5.7      | 351.2    | 271.1    | -50        | -10        | -22        | -21          |
| PGD <sub>2</sub>                         | LMFA03010004  | 5.8      | 351.1    | 233.0    | -30        | -10        | -16        | -13          |
| LXB <sub>4</sub>                         | LMFA03040002  | 6.0      | 351.1    | 220.9    | -60        | -10        | -22        | -13          |
| PGF <sub>2γ</sub>                        | LMFA03010002  | 6.1      | 353.1    | 193.0    | -80        | -10        | -34        | -11          |
| RvD2                                     | LMFA04000007  | 6.2      | 375.1    | 277.1    | -60        | -10        | -18        | -15          |
| LXA <sub>4</sub>                         | LMFA03040001  | 6.5      | 351.1    | 114.8    | -40        | -10        | -20        | -11          |
| 13,14-dihydro-15-keto-PGF <sub>2</sub> α | LMFA03010027  | 6.6      | 353.1    | 195.0    | -110       | -10        | -32        | -11          |
| AT-RvD1                                  | LMFA04000074  | 6.7      | 375.0    | 215.0    | -50        | -10        | -26        | -11          |
| RvD1                                     | LMFA04000006  | 6.7      | 375.1    | 215.0    | -50        | -10        | -26        | -11          |
| epi-LXA <sub>4</sub>                     | LMFA03040003  | 6.8      | 351.1    | 114.9    | -20        | -10        | -22        | -11          |
| RvE1                                     | LMFA03070019  | 7.8      | 333.1    | 114.9    | -35        | -10        | -18        | -15          |
| 18S-RvE3                                 | LMFA03070048  | 8.8      | 333.1    | 245.2    | -25        | -10        | -16        | -17          |
| 6-trans-LTB <sub>4</sub>                 | LMFA03020013  | 8.9      | 335.1    | 194.9    | -105       | -10        | -22        | -11          |
| 8S,15S-diHETE                            | LMFA03060050  | 8.9      | 335.1    | 207.9    | -55        | -10        | -22        | -17          |
| LTD <sub>4</sub>                         | LMFA03020006  | 9.0      | 495.1    | 177.0    | -70        | -10        | -28        | -19          |
| 6-trans-12-epi-LTB <sub>4</sub>          | LMFA03020014  | 9.1      | 335.1    | 194.9    | -80        | -10        | -22        | -25          |
| 10S,17S-diHDHA (PDX)                     | LMFA04000047  | 9.2      | 359.1    | 153.0    | -70        | -10        | -22        | -9           |
| 18R-RvE <sub>3</sub>                     | LMFA03070049  | 9.2      | 333.1    | 245.0    | -55        | -10        | -18        | -23          |
| 7S-MaR1                                  | n.a.          | 9.3      | 359.1    | 249.9    | -20        | -10        | -20        | -19          |
| MaR1                                     | LMFA04000048  | 9.4      | 359.2    | 250.2    | -65        | -10        | -20        | -13          |
| LTB <sub>4</sub> -d <sub>4</sub>         | LMFA03020030  | 9.4      | 339.1    | 196.9    | -70        | -10        | -22        | -19          |
| LTB <sub>4</sub>                         | LMFA03020001  | 9.4      | 335.1    | 195.0    | -65        | -10        | -22        | -21          |
| 14,15-diHETE                             | LMFA03060077  | 9.5      | 335.1    | 207.0    | -65        | -10        | -24        | -21          |
| 7,17-diHDPAs                             | n.a.          | 9.5      | 361.1    | 198.9    | -45        | -10        | -26        | -23          |
| LTE <sub>4</sub>                         | LMFA03020002  | 9.6      | 438.1    | 333.1    | -55        | -10        | -26        | -15          |
| 19,20-diHDPAs                            | LMFA04000043  | 10.2     | 361.1    | 273.0    | -55        | -10        | -22        | -15          |
| 9-HOTrE                                  | LMFA02000024  | 10.2     | 293.0    | 170.9    | -75        | -10        | -20        | -15          |
| 13-HOTrE                                 | LMFA02000051  | 10.3     | 293.0    | 195.0    | -45        | -10        | -24        | -19          |
| 18-HEPE                                  | LMFA03070038  | 10.4     | 317.1    | 259.0    | -5         | -10        | -16        | -7           |
| 15-HEPE                                  | LMFA03070009  | 10.5     | 317.1    | 219.0    | -65        | -10        | -18        | -19          |
| 13-HODE                                  | LMFA02000228  | 10.8     | 295.0    | 194.9    | -110       | -10        | -24        | -21          |
| 9-HODE                                   | LMFA02000188  | 10.8     | 295.0    | 171.0    | -130       | -10        | -22        | -7           |
| 15-HETE-d <sub>8</sub>                   | LMFA03060080  | 10.9     | 327.2    | 226.0    | -85        | -10        | -18        | -11          |
| 15-HETE                                  | LMFA03060001  | 11.0     | 319.1    | 219.1    | -55        | -10        | -18        | -9           |
| 11-HETE                                  | LMFA03060003  | 11.1     | 319.1    | 167.0    | -70        | -10        | -22        | -15          |
| 17-HDHA                                  | LMFA04000072  | 11.1     | 343.1    | 245.0    | -65        | -10        | -16        | -15          |
| 12-HETE                                  | LMFA03060007  | 11.2     | 319.1    | 179.0    | -65        | -10        | -20        | -23          |
| 8-HETE                                   | LMFA03060006  | 11.2     | 319.1    | 154.9    | -70        | -10        | -20        | -19          |
| 5-HETE                                   | LMFA03060002  | 11.3     | 319.1    | 115.0    | -65        | -10        | -18        | -11          |
| ALA                                      | LMFA01030152  | 12.4     | 277.0    | 233.0    | -90        | -10        | -22        | -29          |
| EPA                                      | LMFA01030759  | 12.4     | 301.0    | 202.9    | -125       | -10        | -18        | -21          |
| DHA-d <sub>5</sub>                       | LMFA01030762  | 12.4     | 332.0    | 288.1    | -75        | -10        | -16        | -13          |
| DHA                                      | LMFA01030185  | 12.7     | 327.1    | 229.2    | -115       | -10        | -18        | -11          |
| AA                                       | LMFA01030001  | 12.7     | 303.0    | 205.1    | -155       | -10        | -20        | -11          |
| LA                                       | LMFA01030120  | 12.8     | 279.0    | 261.0    | -115       | -10        | -28        | -13          |
| DPA n-3                                  | LMFA04000044  | 13.0     | 329.1    | 231.1    | -50        | -10        | -20        | -17          |
| AdA                                      | LMFA01030178  | 13.1     | 331.1    | 233.0    | -130       | -10        | -22        | -11          |

Figure S IVa: MS/MS of 0.1 ng/mL standard sample  
at Relative RT 1.016 (Leukotriene E<sub>4</sub>)

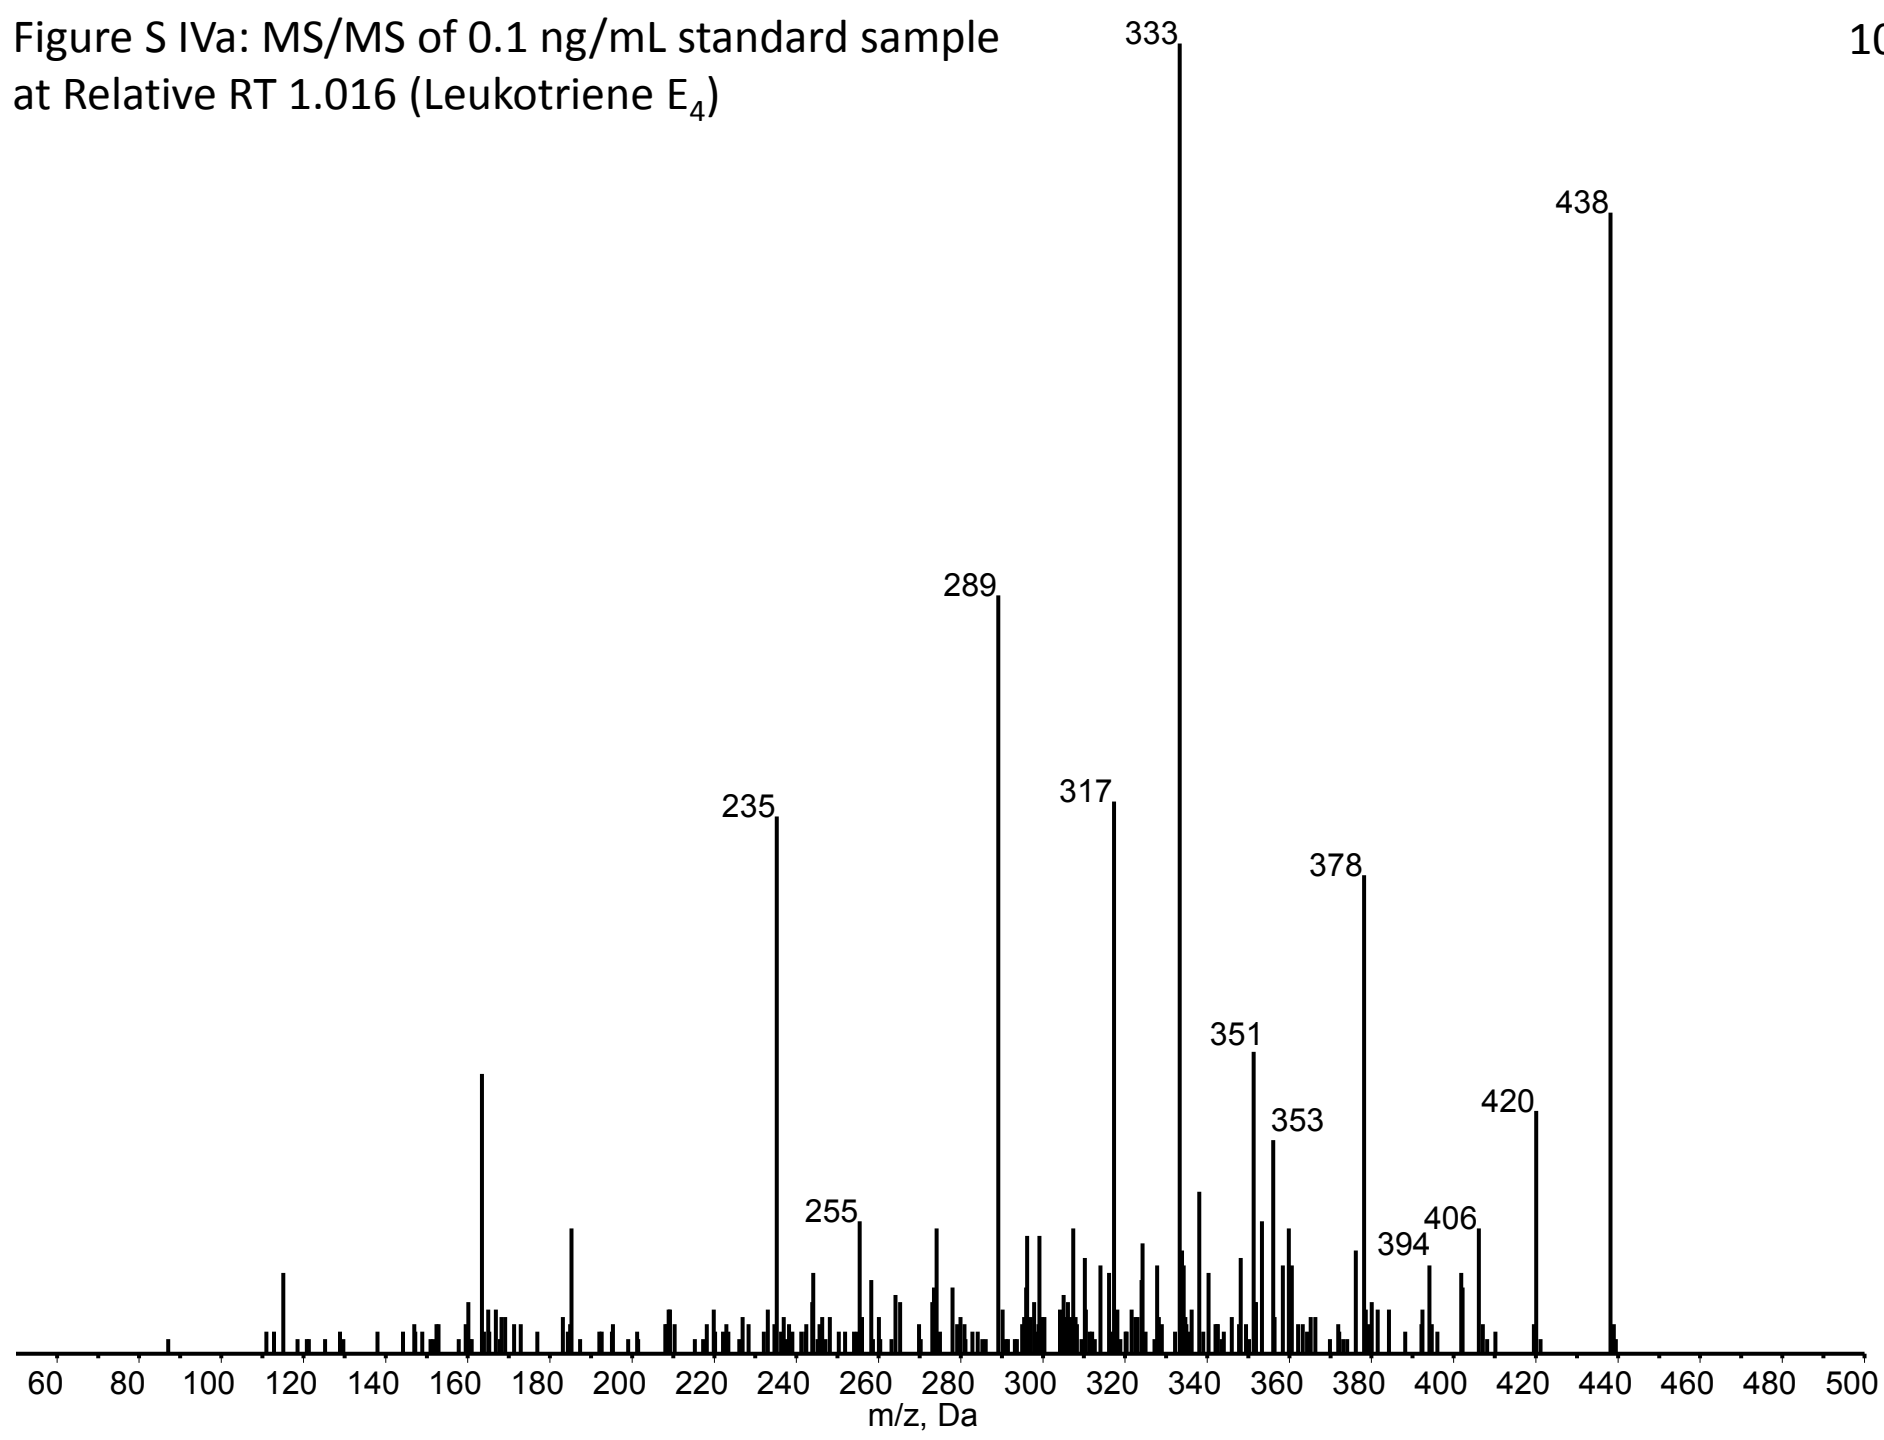

Figure S IVb: MS/MS spectra of representative sample at Relative RT 1.015 (Leukotriene E<sub>4</sub>)

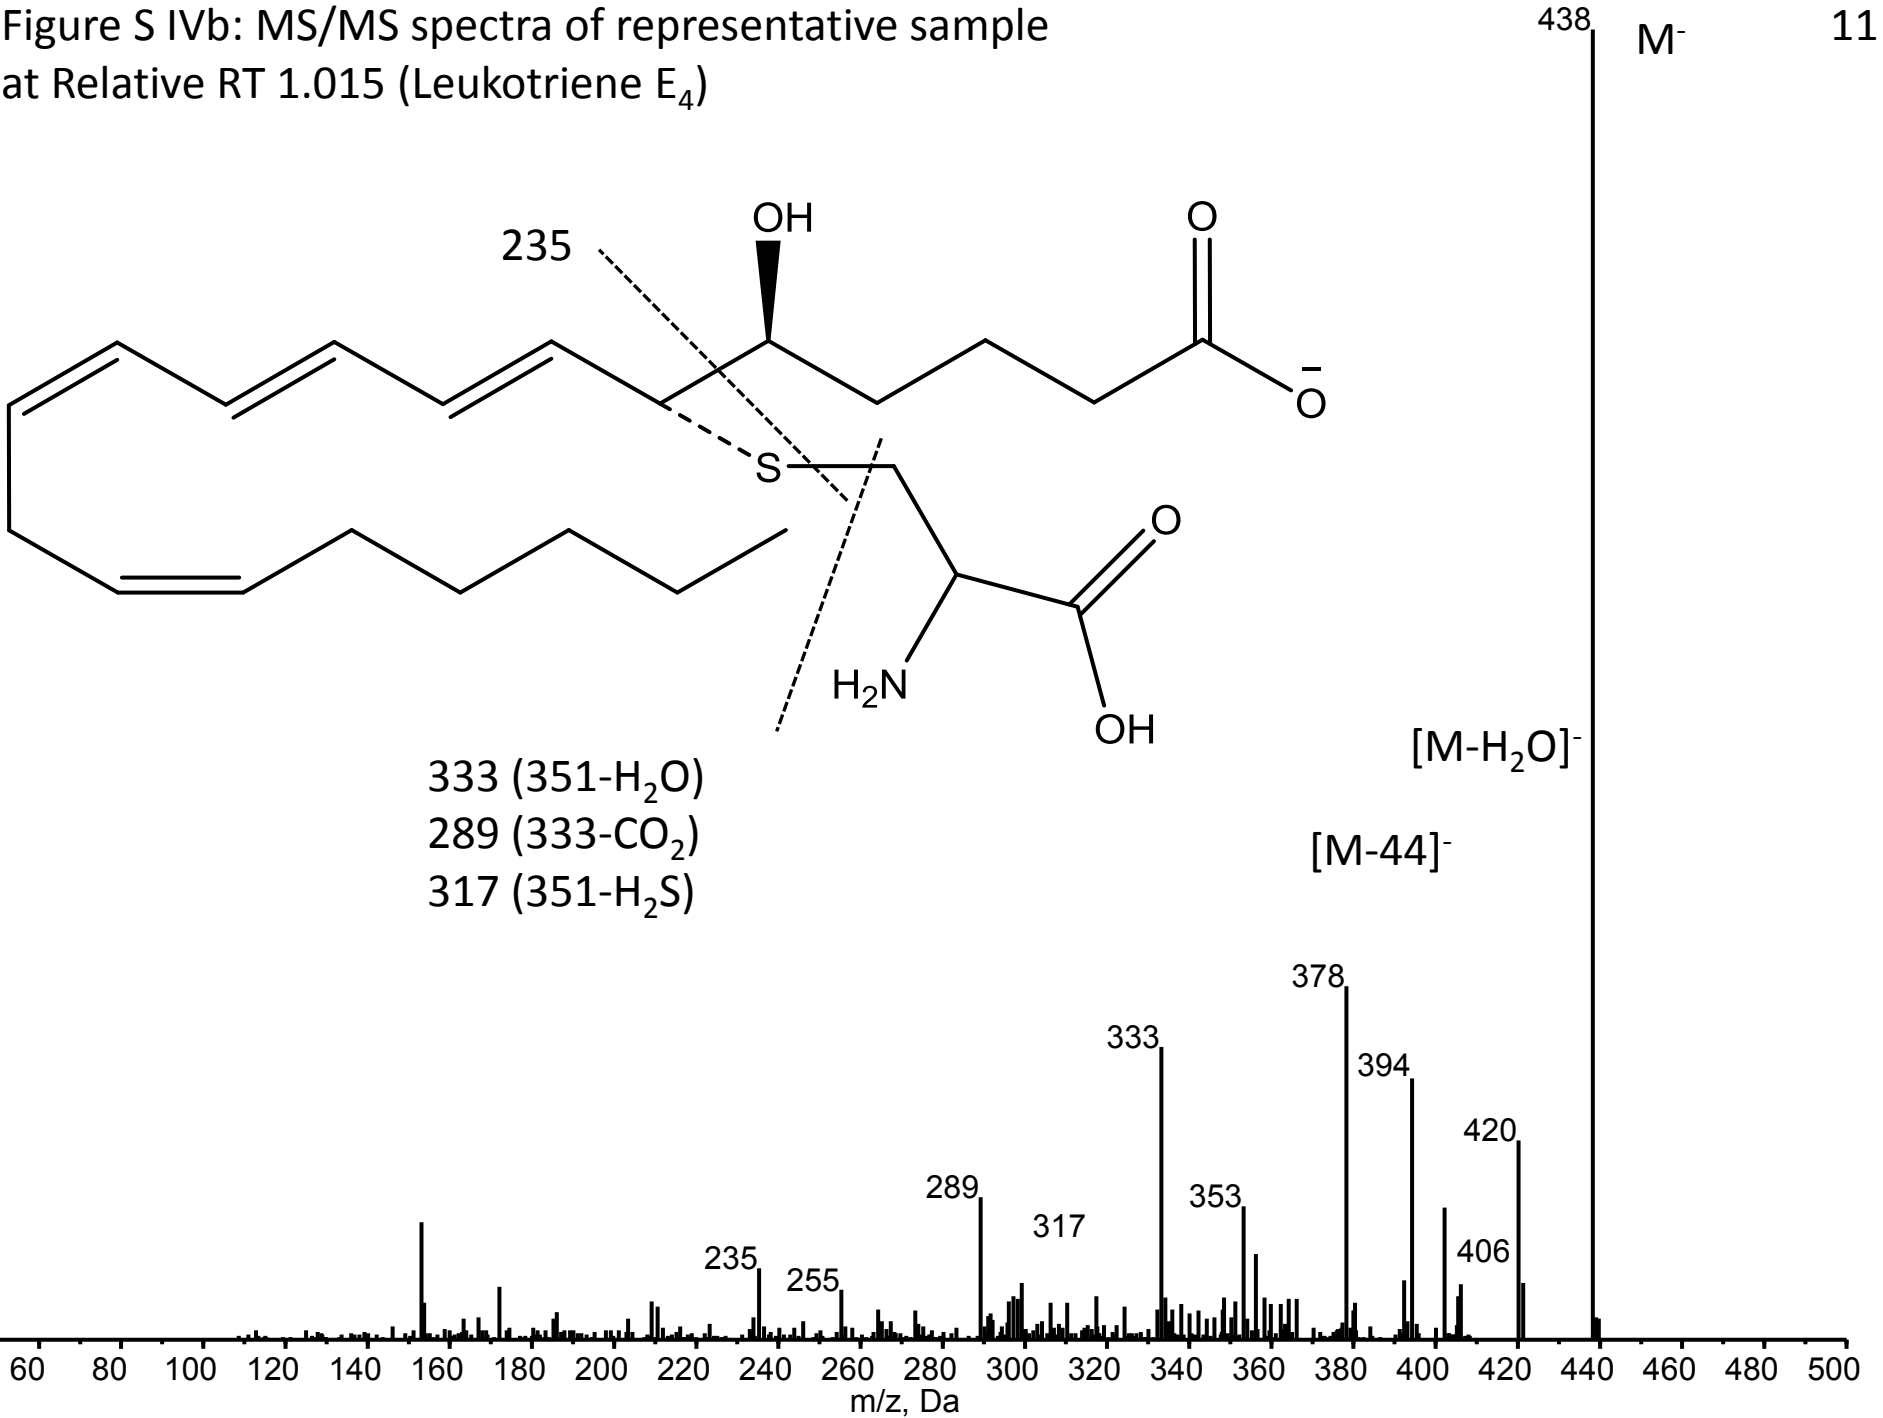

Figure S Va: MS/MS spectra of 0.1 ng/mL standard sample at Relative RT 0.925 (Thromboxane B<sub>2</sub>)

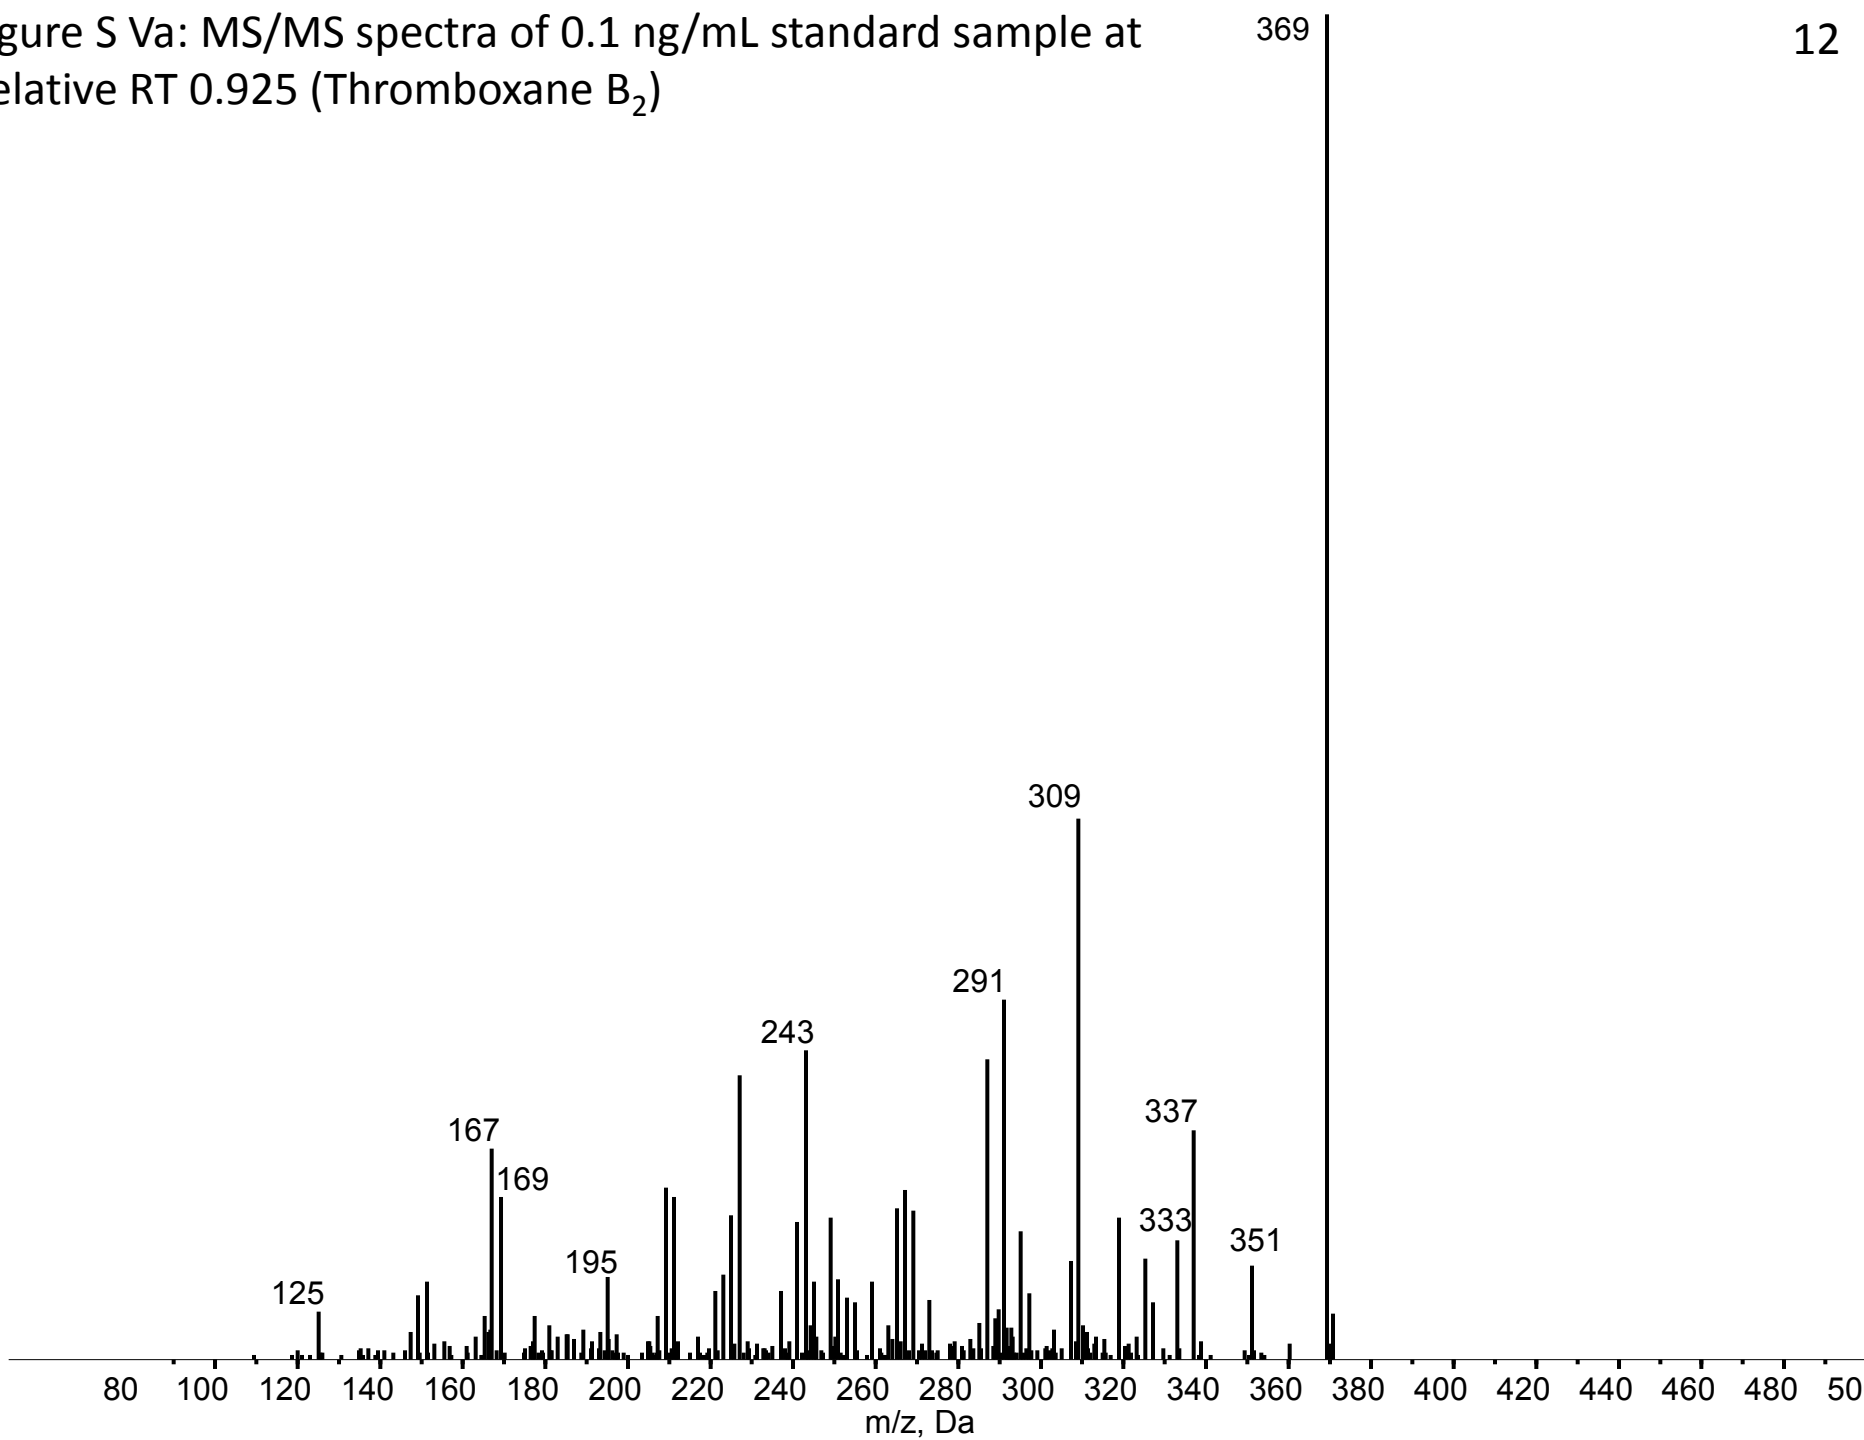



Figure S VIa: MS/MS spectra of 0.1 ng/mL standard sample at Relative RT 1.087 (19,20-diHDPA)

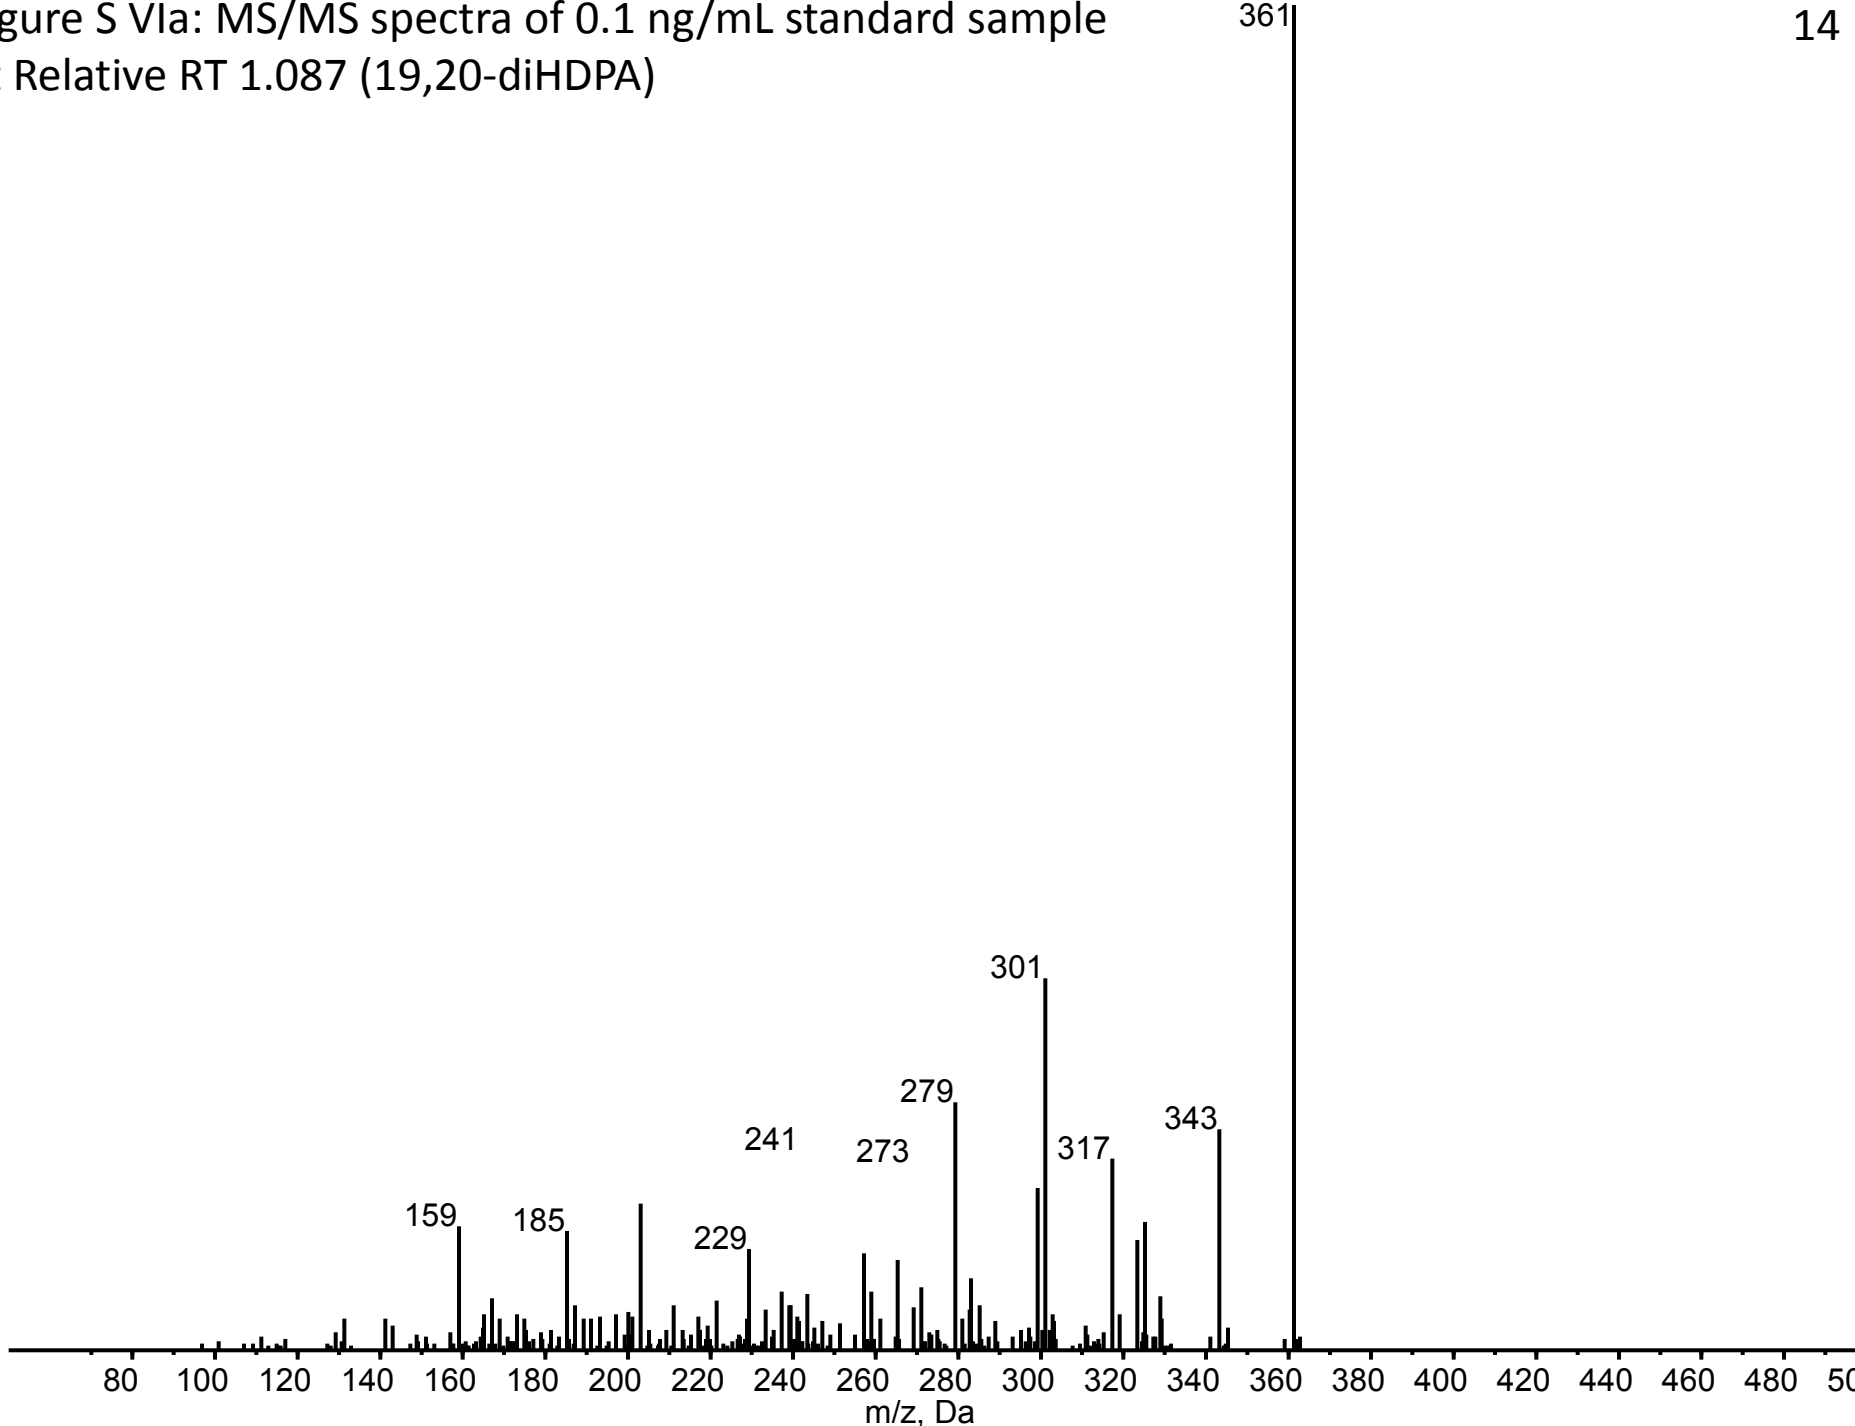

Figure S VIb: MS/MS spectra of representative sample at Relative RT 1.087 (19,20-diHDPA)

361

M<sup>-</sup>

15

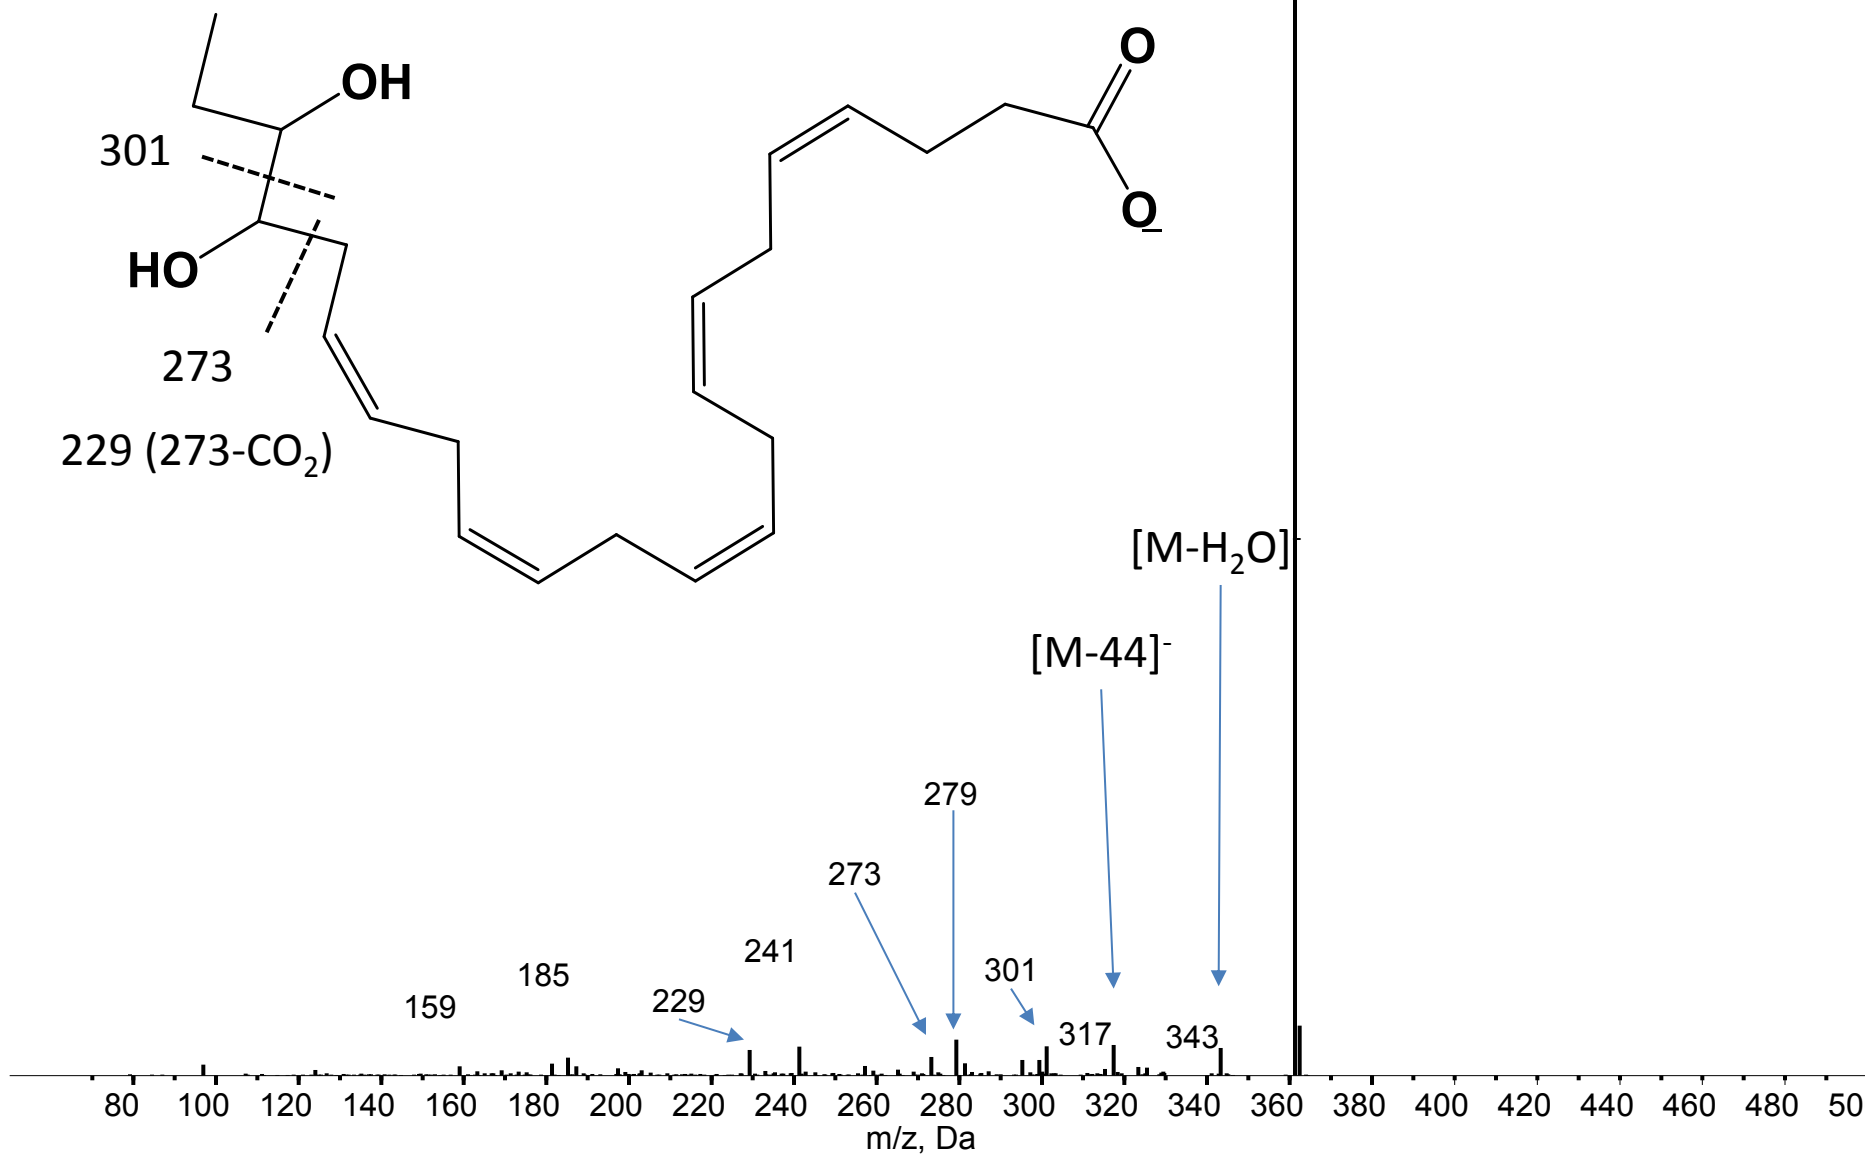

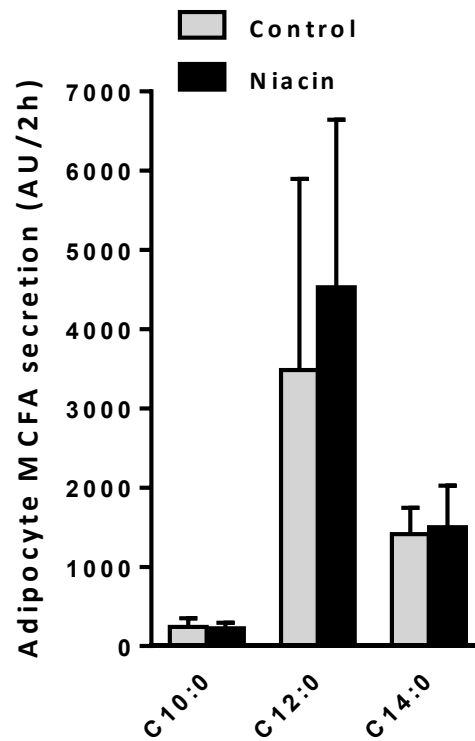

Figure S VII: Release of medium chain saturated fatty acids from adipocytes isolated from APOE\*3-Leiden.CETP mice fed a western type diet with 0.1% cholesterol with and without niacin. Fatty acid release in arbitrary units during a 2 hour *ex vivo* basal incubation. Mean $\pm$ SD, N=14 for Control/N=13 for Niacin.



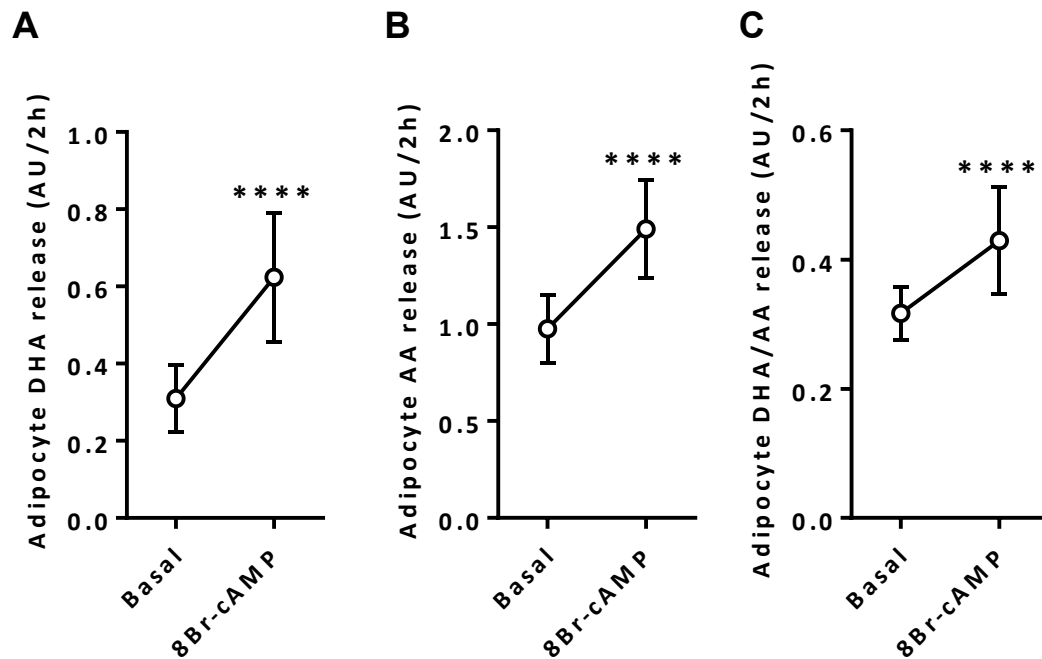

Figure S VIII: Release of DHA and AA from adipocytes isolated from APOE\*3-Leiden.CETP mice fed a western type diet with 0.1% cholesterol without niacin. Fatty acid release in arbitrary units during a 2 hour *ex vivo* incubation in basal and 8Bromo-cAMP stimulated conditions. Mean $\pm$ SD, N=14 for Control/N=13 for Niacin.

\*\*\*\* p<0,0001 for Basal vs 8Br-cAMP

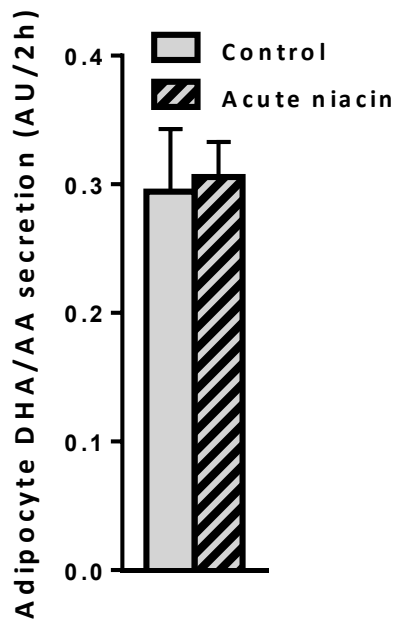

Figure S IX: Ratio of DHA/AA released fatty acids from adipocytes isolated from APOE\*3-Leiden.CETP mice fed a western type diet with 0.1% cholesterol without niacin. Fatty acid release in arbitrary units during a 2 hour *ex vivo* incubation under basal and acute niacin conditions. Mean $\pm$ SD, N=14 for Control/N=10 for Acute niacin.
